# Supplementary material for: Structural variation of types IV-A1- and IV-A3-mediated CRISPR interference
Source: PubMed Central journal article supplement (PMC11519345; doi:10.1038/s41467-024-53778-1), 2024-10-29
Supplement: 41467_2024_53778_MOESM3_ESM.pdf [file 41467_2024_53778_MOESM3_ESM.pdf]

Supplementary Data 1.

Commercial reagents. List of commercial reagents used in this study.

Supplementary Data 2.

Plasmid Sequences. List and sequences of plasmids used in this study.
